# Supplementary material for: Soft material with intense photoluminescence obtained by dissolving Eu2O3 and organic ligand into a task-specific ionic liquid
Source: Royal Society of Chemistry journal article supplement (doi:10.1039/b810631b), 2008-01-01
Supplement: b810631b.pdf [file b810631b.pdf]

*Electronic support information*

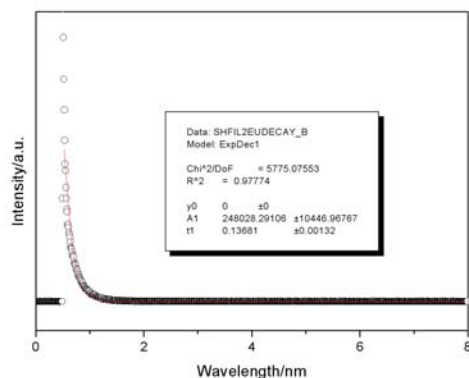

*ESL Decay curve of IL-Eu, measured at room temperature using an excitation wavelength of 395nm and monitored around the most intense emission line at 613nm. (open circle:experimental data; solid line: fitted according to  $I=I_0+A\exp[-(t-t_0)/\tau]$ )*

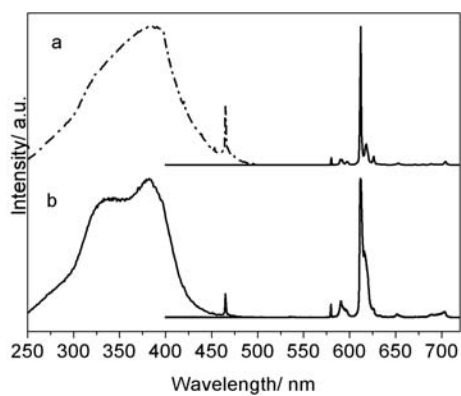

*ESI2 Excitation (dash dot line) and emission (solid line) spectra of a) ternary complex  $(Eu(TTA)_3Phen)$  in solid state, and b) dissolved in IL (0.5mol%)*

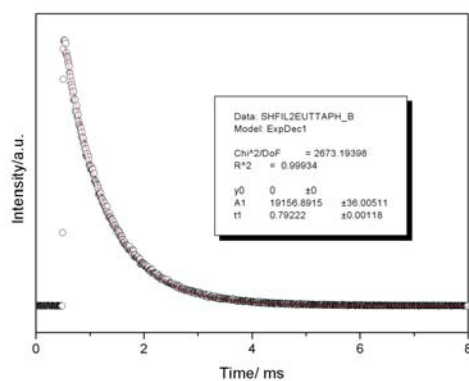

*ESI3* Decay curve of IL-Eu-TTa-Phen, measured at room temperature using an excitation wavelength of 350nm and monitored around the most intense emission line at 612nm. (open circle:experimental data; solid line: fitted according to  $I=I_0+A\exp[-(t-t_0)/\tau]$ )
